# Supplementary material for: Genome-Wide Characterization and Haplotypic Variation Analysis of the YUC Gene Family in Foxtail Millet (Setaria italica)
Source: MDPI journal article supplement (doi:10.3390/ijms242115637), 2023-10-27
Supplement: s1 [file s1]

Supplemental Figure:

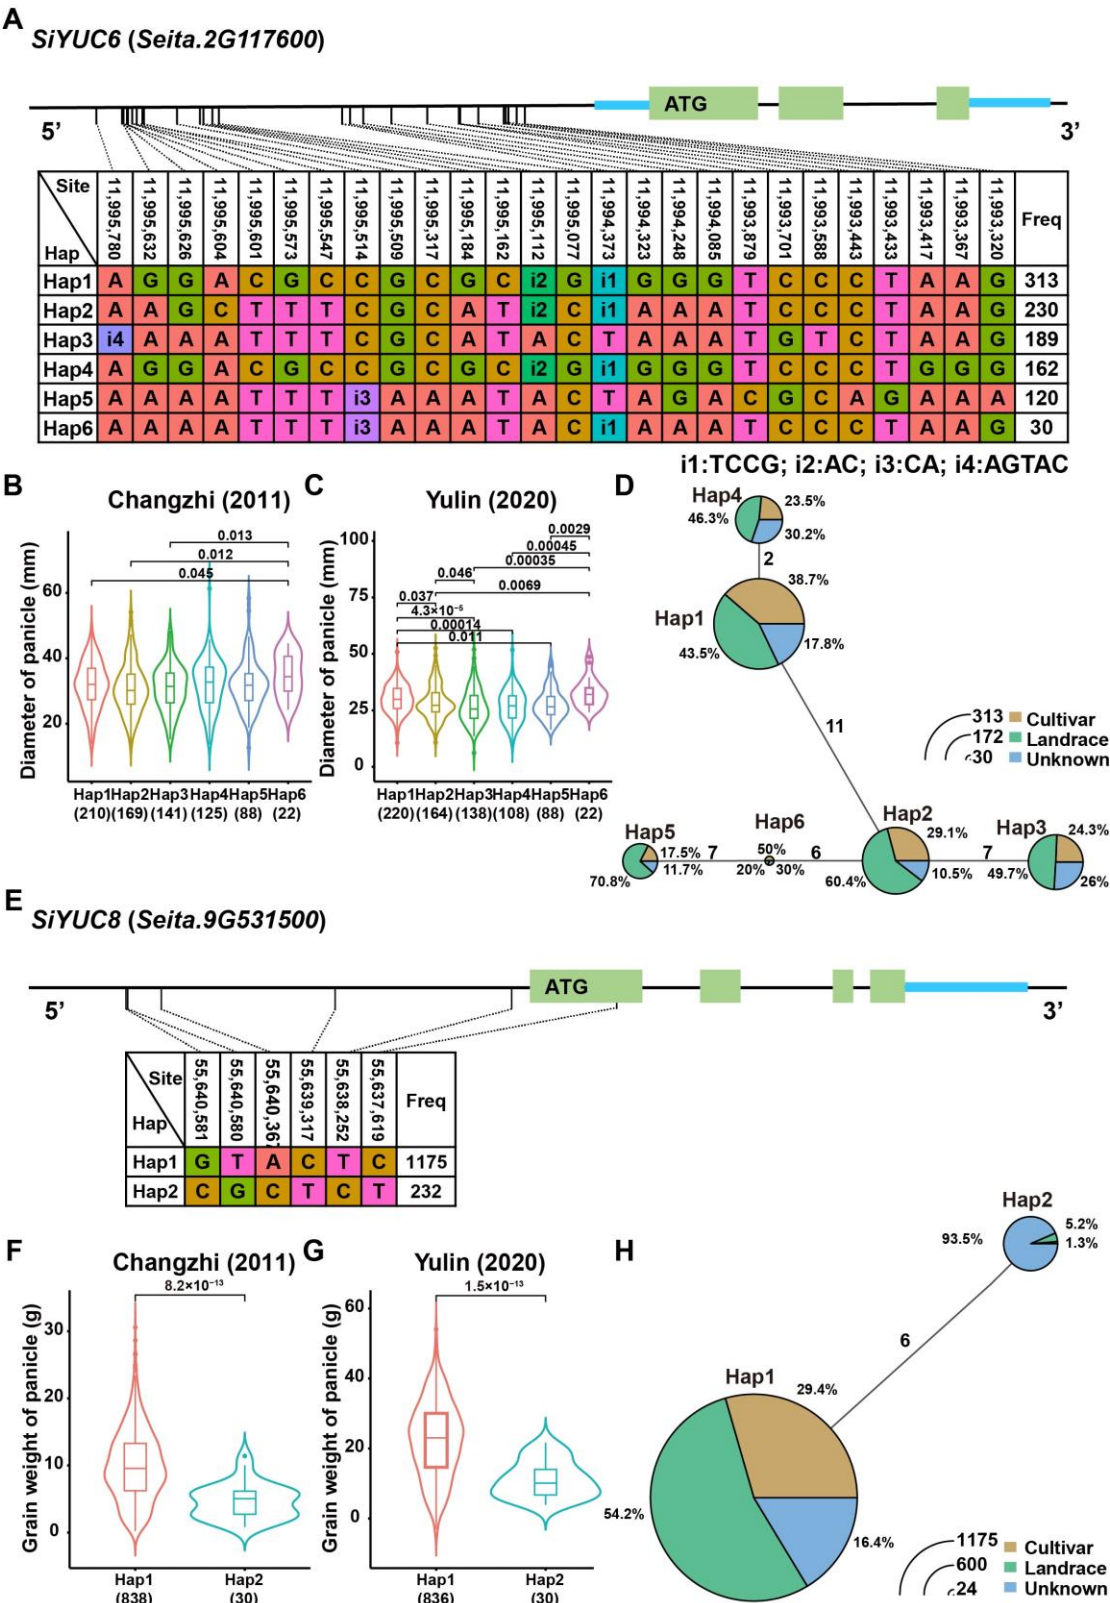

Figure S2. Haplotype analysis of *SiYUC6* and *SiYUC8*. A, E SNPs were used for haplotype analysis of *SiYUC6*, *SiYUC8*, respectively. light green rectangles indicate exons, straight lines

indicate introns, and SNPs in the promoter and coding sequence of the gene are shown in the upper table. The UTR region is indicated in light blue. Indel was represented by i1-i4. B, C, F, G, The correlation analysis of haplotypes with panicle phenotypes in two different environments. The number in parentheses below the horizontal axis indicates the number of materials contained in the haplotype. D, H Proportion of different foxtail millet resources among haplotypes and haplotype network analysis. Numbers over the line between haplotypes indicate the number of SNPs between them. Percentages indicate the proportion of each foxtail millet resource in that haplotype.
