# Supplementary material for: Genome-Wide Characterization and Haplotypic Variation Analysis of the YUC Gene Family in Foxtail Millet (Setaria italica)
Source: Int J Mol Sci. 2023 Oct 27;24(21):15637. doi: 10.3390/ijms242115637 (PMC10648439; doi:10.3390/ijms242115637)
Supplement: Supplementary file 1 [file ijms-24-15637-s001.zip]

Archive with 7 entries (7 files):
- Figure S1. Identification of conserved motif of YUC proteins in foxtail millet, green foxtail, and sorghum.pdf
- Figure S2. Haplotype analysis of SiYUC6 and SiYUC8. A, E SNPs were used for haplotype analysis of SiYUC6, SiYUC8, respectively.pdf
- Table S1. The YUC genes ID of six species .xlsx
- Table S2. The Cis-element analysis of SiYUCs promoter.xlsx
- Table S3. The tissue information for SiYUCs expression analysis .xlsx
- Table S4. Primers were used for constructing expression vector.xlsx
- Text S1. Information about SiYUCs protein amino acid and prediction data links.txt
