# Supplementary material for: Genome-Wide Characterization and Haplotypic Variation Analysis of the YUC Gene Family in Foxtail Millet (Setaria italica)
Source: Int J Mol Sci. 2023 Oct 27;24(21):15637. doi: 10.3390/ijms242115637 (PMC10648439; doi:10.3390/ijms242115637)
Supplement: Supplementary file 1 [file ijms-24-15637-s001.zip › Table S1. The YUC genes ID of six species .xlsx]

## Sheet: Sheet1
Table S1. The YUC genes ID of six species
Gene Name	Gene ID	Gene Name	Gene ID	Gene Name	Gene ID
ZmYUC1	GRMZM2G091819	OsYUC1	LOC_Os01g45760	SiYUC1	Seita.5G243100
ZmYUC2	GRMZM2G159393	OsYUC2	LOC_Os05g45240	SiYUC2	Seita.5G015200
ZmYUC3	GRMZM2G107761	OsYUC3	LOC_Os01g53200	SiYUC3	Seita.5G307200
ZmYUC4	GRMZM2G141383	OsYUC4	LOC_Os01g53200	SiYUC4	Seita.8G204700
ZmYUC5	GRMZM2G132489	OsYUC5	LOC_Os12g32750	SiYUC5	Seita.8G207600
ZmYUC6	GRMZM2G019515	OsYUC6	LOC_Os07g25540	SiYUC6	Seita.2G117600
ZmYUC7	GRMZM2G480386	OsYUC7	LOC_Os04g03980	SiYUC7	Seita.7G015800
ZmYUC8	GRMZM2G017193	OsYUC8	LOC_Os03g06654	SiYUC8	Seita.9G531500
ZmYUC9	GRMZM2G333478	OsYUC9	LOC_Os01g16714	SiYUC9	Seita.5G044300
ZmYUC10	GRMZM2G013045	OsYUC10	LOC_Os01g16750	SiYUC10	Seita.5G050500
ZmYUC11	GRMZM2G328780	OsYUC11	LOC_Os12g08780	SiYUC11	Seita.7G279100
ZmYUC12	GRMZM2G025748	OsYUC12	LOC_Os02g17230	SiYUC12	Seita.8G207800
ZmYUC13	GRMZM2G333035	OsYUC13	LOC_Os11g10140	SiYUC13	Seita.J031600
ZmSPI1	NM-001153364	OsYUC14	LOC_Os11g10170	SiYUC14	Seita.8G100900
SeYUC1	Sevir.5G251100	SbYUC1	Sobic.003G236900	AtYUC1	At4g32540
SeYUC2	Sevir.5G013800	SbYUC2	Sobic.003G012400	AtYUC2	At4g13260
SeYUC3	Sevir.5G309900	SbYUC3	Sobic.003G286500	AtYUC3	At1g04610
SeYUC4	Sevir.8G214800	SbYUC4	Sobic.005G104600	AtYUC4	At5g11320
SeYUC5	Sevir.8G217600	SbYUC5	Sobic.005G104700	AtYUC5	At5g43890
SeYUC6	Sevir.2G124000	SbYUC6	Sobic.002G120300	AtYUC6	At5g25620
SeYUC7	Sevir.7G039200	SbYUC7	Sobic.006G012200	AtYUC7	At2g33230
SeYUC8	Sevir.9G535800	SbYUC8	Sobic.001G495850	AtYUC8	At4g28720
SeYUC9	Sevir.5G042300	SbYUC9	Sobic.008G154300	AtYUC9	At1g04180
SeYUC10	Sevir.5G049700	SbYUC10	Sobic.003G128700	AtYUC10	At1g48910
SeYUC11	Sevir.7G290100	SbYUC11	Sobic.008G064100	AtYUC11	At1g21430
SeYUC12	Sevir.8G217800
