# Supplementary material for: Genome-Wide Characterization and Haplotypic Variation Analysis of the YUC Gene Family in Foxtail Millet (Setaria italica)
Source: Int J Mol Sci. 2023 Oct 27;24(21):15637. doi: 10.3390/ijms242115637 (PMC10648439; doi:10.3390/ijms242115637)
Supplement: Supplementary file 1 [file ijms-24-15637-s001.zip › Table S2. The Cis-element analysis of SiYUCs promoter.xlsx]

## Sheet: Sheet1
Table S2. The Cis-elements analysis of SiYUCs promoter
Gene ID Motif	SiYUC1	SiYUC2	SiYUC3	SiYUC4	SiYUC5	SiYUC6	SiYUC7	SiYUC8	SiYUC9	SiYUC10	SiYUC11	SiYUC12	SiYUC13	SiYUC14
3-AF1 binding site	-	1	-	-	-	-	-	-	-	-	-	-	-	-
ABRE	4	3	3	8	-	3	1	1	4	1	-	6	-	5
ABRE3a	1	1	-	2	-	1	-	-	2	-	-	-	-	1
ABRE4	1	1	-	2	-	1	-	-	2	-	-	-	-	1
ACE	-	-	-	-	1	1	-	-	-	1	-	-	-	-
AE-box	-	-	-	-	-	1	-	-	-	1	-	-	-	-
ARE	4	1	4	1	1	3	3	3	1	2	5	-	-	-
as-1	1	1	2	3	-	1	-	2	2	2	-	5	-	2
box S	-	-	1	1	-	1	2	-	-	-	-	-	-	-
CAAT-box	36	33	30	23	35	33	22	32	22	25	38	27	-	31
CCAAT-box	-	-	-	1	-	1	1	-	-	1	-	-	-	-
CCGTCC motif	-	1	1	2	-	-	-	1	5	1	-	3	1	-
CGTCA-motif	1	1	2	3	-	1	-	2	2	2	-	5	-	2
CTAG-motif	-	1	-	-	-	-	-	-	-	1	-	-	-	-
DRE core	-	1	-	2	1	-	1	-	2	1	-	2	-	1
ERE	-	3	2	1	1	-	-	1	-	1	1	-	-	1
GA-motif	-	-	-	-	-	2	-	-	-	-	-	-	-	-
GATA-motif	2	1	1	4	-	-	-	-	-	2	-	1	-	1
G-box	3	1	4	7	-	3	1	1	3	2	-	7	-	3
GC-motif	-	1	-	1	-	1	2	-	-	1	-	-	-	1
GT1-motif	1	4	1	-	-	-	-	-	-	1	-	-	-	-
LAMP-element	-	-	-	-	-	1	-	-	-	-	-	-	-	-
LTR	-	-	-	1	-	1	-	1	-	1	-	1	-	-
MBS	-	-	1	1	-	1	-	-	-	1	-	-	-	-
MBSI	-	1	-	-	-	-	-	-	-	-	-	-	-	-
Myb	6	5	5	6	4	2	1	6	3	5	5	4	-	6
MYB recognition site	-	-	-	1	-	1	1	-	-	1	-	-	-	-
Myb-binding site	2	1	-	1	-	1	1	1	3	-	2	2	-	2
MYB-like sequence	2	2	1	-	3	-	-	1	-	2	2	-	-	3
MYC	4	5	3	4	5	1	4	4	1	3	3	2	-	6
NON-box	-	-	-	-	-	1	-	-	-	-	-	-	-	-
O2-site	-	-	1	1	-	1	2	-	-	2	-	1	-	-
re2f-1	-	-	-	-	-	1	-	-	-	-	-	-	-	-
RY-element	-	-	1	-	-	2	-	-	-	-	-	-	-	-
Sp1	-	1	-	1	-	-	2	-	-	-	-	-	-	-
STRE	2	4	2	5	2	5	8	2	2	8	6	3	-	3
TATA-box	36	33	14	19	36	46	9	24	14	36	64	14	-	16
TCA	-	1	-	-	1	1	-	-	-	1	1	-	-	-
TCA-element	1	-	1	-	1	1	1	-	-	1	-	-	-	1
TCCC-motif	-	-	1	-	1	1	2	-	-	-	-	-	-	-
TC-rich repeats	-	-	2	-	-	1	-	1	-	-	1	1	-	-
TCT-motif	1	2	3	1	1	1	-	-	1	-	-	-	-	-
TGACG-motif	1	1	2	3	-	1	-	2	2	2	-	5	-	2
TGA-element	-	1	-	-	-	2	-	-	1	-	1	-	-	-
W box	1	-	1	1	-	1	2	3	1	-	-	1	-	-
WRE3	2	1	3	1	-	-	2	-	-	1	-	-	-	-
