# Supplementary material for: Genome-Wide Characterization and Haplotypic Variation Analysis of the YUC Gene Family in Foxtail Millet (Setaria italica)
Source: Int J Mol Sci. 2023 Oct 27;24(21):15637. doi: 10.3390/ijms242115637 (PMC10648439; doi:10.3390/ijms242115637)
Supplement: Supplementary file 1 [file ijms-24-15637-s001.zip › Table S3. The tissue information for SiYUCs expression analysis .xlsx]

## Sheet: Sheet1
Table S3. The tissue information for SiYUCs expression analysis
Name	Growth stage	Tissue
Em-Seed	Seedling stage	Emerging seed
Sd-Leaf	Seedling stage	First leaf
Sd-Root	Seedling stage	First root
Tl-Leaf	Three-leaf stage	Leaves
Tl-Root	Three-leaf stage	Roots
Ss-Leaf	Shooting stage	Fully developed leaf
Ss-Node	Shooting stage	Node
Ss-Root	Shooting stage	Root
Ss-Stem	Shooting stage	Stem
Bs-Leaf	Booting stage	Young flag leaf
Bs-Node	Booting stage	Node
Bs-Stem	Booting stage	Stem
Bs-SAM	Booting stage	SAM (0.5-2 cm)
Bs-Panicle	Booting stage	Young Panicle
PF-Panicle	Pre-Flowering stage	Panicle Before Flowering
Fl-Panicle	Flowering stage	Flowering Panicle
Fl-SBranches	Flowering stage	Secondary Branches
Fl-PBranches	Flowering stage	Primary Branches
Fl-Leaf	Flowering stage	Flag leaf
Fl-Sheath	Flowering stage	Leaf sheath
Fl-Pulvinus	Flowering stage	Leaf pulvinus
Fl-Pollen	Flowering stage	Pollen
M1-Seed	Mature stage	Milking Seed
M2-Seed	Mature stage	Hard Seed
M3-Seed	Mature stage	Mature Seed
