# Supplementary material for: Genome-Wide Characterization and Haplotypic Variation Analysis of the YUC Gene Family in Foxtail Millet (Setaria italica)
Source: Int J Mol Sci. 2023 Oct 27;24(21):15637. doi: 10.3390/ijms242115637 (PMC10648439; doi:10.3390/ijms242115637)
Supplement: Supplementary file 1 [file ijms-24-15637-s001.zip › Table S4. Primers were used for constructing expression vector.xlsx]

## Sheet: Sheet1
Table S4. Primers were used for constructing expression vector
Primer Name	Sequence
SiYUC11F	CGAGCTGTACAGATCTATGGAGAAGGTACTAGTTTTGATCG
SiYUC11R	GGCCGCTTTAAGATCTTTAATAAAATGATCCCATCGAATCC
SiYUC13F	CGAGCTGTACAGATCTATGGCGGTGGCGGAGGAG
SiYUC13R	GGCCGCTTTAAGATCTTCATGGTGAAGGGCCCCAC
