# Supplementary material for: Genome-Wide Characterization and Haplotypic Variation Analysis of the YUC Gene Family in Foxtail Millet (Setaria italica)
Source: Int J Mol Sci. 2023 Oct 27;24(21):15637. doi: 10.3390/ijms242115637 (PMC10648439; doi:10.3390/ijms242115637)
Supplement: Supplementary file 1 [file ijms-24-15637-s001.zip › Text S1. Information about SiYUCs protein amino acid and prediction data links.txt]

>SiYUC6-Seita.2G117600.1.p（https://alphafold.ebi.ac.uk/entry/A0A4U6VPK3）
MVVWVNGPIVVGAGPAGLSVAACLRARGVPSVVLDRADCVASLWQRRAYDRLRLHLPRHFCELPGMPFPDHYPEYPTKSQFVDYLEAYAARAGVEPRFNQAVTSARYDAAAGLWRVRAEDASAGGAGTATEYIGRWLVVATGENAERVVPDFDGADEFAGPVSHVSEYKCGEAYRGKRVLVVGCGNSGMEVCLDLCDHNALPAMVVRDSKVHVLPREMFGVATFYIAAFLLRFLPLWLVDMILVVLARLFLGNLEKLGIHRPSGGPLELKNTRGRTPVLDIGALARIRSGDIEVVPGIKRFFRGGAELVDGRRVAADAVILATGYHSNVPQWLKGSDFFTQEGYPRVPFPDGWKGESGLYSVGFTRRGLSGVSSDAVKVAQDIAMEWDQQTSTL*
>SiYUC2-Seita.5G015200.1.p（https://alphafold.ebi.ac.uk/entry/K3XPU6）
MDRFAETEGKRAHDPLYSPRRAARATATGFPVGEHGEVFAGPLIVGAGPAGLAVAACLTMRGVPYALLERHGCIASLWRHRTYRRLRLHLPKRYCELPLMPFPSSYPEYPTREQFLDYLEEYIRTFGIRPFFRQEVVSAEFDGELWCVRTKEIVTATIDGGKEAVLSTATREYRSKWLVVATGENAEPVVPEIDGIDCFKGQVMHSCDYRSGEPYQGSKVLVVGCGNSGMEVSLDLSNHNVHTSMVVRDTMHVLPREIMGLSTFGLSLWLLMCLSVQTVDKILLLLTRLVLGDTARLGIPRPSIGPMELKKISGKTPVLDVGTIAKIKSGDIKVLPAIQSFREHDVKFIDGKTEDFDAVILATGYKSNVPYWLKENDFFFEKDGFPRKPNEWKGKNGLYAAGFSRRGLLGVSIDATKIADDIARCWSDIGYEKHKTK*
>SiYUC9-Seita.5G044300.1.p（https://alphafold.ebi.ac.uk/entry/K3XIK3）
MATGGGGGVVAPPPEVIVVGAGPSGLAVSACLSLRGVPSLVLERDDCVGSLWRKRAYDRLTLHLPKQASALPHAPHADEAPTYLPRDDFVRYLDGYAGRFGVRARLRREVRAARFDAARRRWDVEALDHGTGELERHAARFLVVATGSYDEKFVPKVPGLEGFPGKVMHASEYRSGKGMEGKSVLVVGCGNSGMEIALDLAENGAITSIVVRSEVHILTKQILNLGVKLGFYLPIWMIDMLALFLCYLVFGDTSKHGIKRPAVGPFTMNRQTAALPVIDVGTYKKIKSGEIQVIPTGMTSVQGNVVEFADGRRHPFDAIVFATGYRSGIKRWLQDGSSELVGNDGILKQRSPKAGNGLYYAGLSGRGIFGSGTDAEFIADDISKQLQPVHEHEAHGKPEH*
>SiYUC10-Seita.5G050500.1.p（https://alphafold.ebi.ac.uk/entry/A0A4U6U9W9）
MAVAEEEEVIIVGAGQSGIAVAACLSLRGVRSLVLERDDCVGSLWRKRTYDRLHLHLAKQYSALPHAPHAEEAPTYLPRDEFARYLDGYAARFAVRTRLRREVRSAGFDAGKGRWEVEAVDLATGRRELYAARFLVVASGENDERFVPEVPGLEAFPGTVVHAAEYRSGEGLRGKAVLVVGCGNSGMEIAYDLAAAGAVTSISVRSELHLVTREIWNVAMSLYGYHVPAWIIDKLVLLMCAVVFGGDTARHGLRRPAVGPFTMKLTTPAYPVIDVGTYSKIRTGEIRVLPAGVKSVRGNVVEFADGRRHPFDAIVLATGYRSTVRRWLRSDDGLIGDDGMAARPYPEHWKGGNGLYCAGLVRRGIYGSYSDAELIAGDISELLRPQQTHSNGSNK*
>SiYUC1-Seita.5G243100.1.p（https://alphafold.ebi.ac.uk/entry/A0A368R8F1）
MDGEAQGRRRPAWVPGAIIVGAGPSGLAAAACLAARGVPATVLEMSDSLASTWRHRTYDRLTLHLPKRFCELPLLPFPQGYPAYPSKDQFVAYMESYAAAAGVAPRFGARVEEAAFDAAAGAWAVRLAGGELLLARWLVVATGENAVPREPEFPGAPRFAGRVMHTRDYKSGEVFSGKKVLVVGCGNSGMEVSLDLCRHGAKPSMVVRNTVHVLPREMLGLSTFGIAMALLKLFSVQVVDRILLAAARLTLGDTGKLGLRRPKTGPMELKNLTGRTPVLDVGTLGHIKTGKIKVVGAVKEVTRSGVRFADGKEEQFDAIILATGYRSNVPSWLKRGLLGASSDALNIARDIHCQWKDMGRPANNNVLQSDDTV*
>SiYUC3-Seita.5G307200.1.p（https://alphafold.ebi.ac.uk/entry/A0A368RAL2）
MDPWSESEGKRAHDPIFQCFNQNQNHLQSVENCWKERSVDGVVARSERTCFWVSGPIIVGAGPSGLAVAACLKEKGIGSLILERSNCIASLWQLKTYDRLSLHLPRKFCELPLMPFPADYPIYPSKQQFVAYLESYAARFGINPMYNCTVVHAEYDEQLLLWRVSSQTSGAMGEEVQYVSRWLIIATGENAEAVQPDIDGLQEFPGTVLHTSAYKSGSAFTGKRVLVLGCGNSGMEVCLDLCNHNAEPHIVVRDAVHILPREMLGHSTFGLSMWLLKWLPVHVVDRILLCIARAILGDTARLGLKRPTFGPLELKSLSGKTPVLDVGTFAKIKSGDIKVRPAVRKISGRDVEFVDGQLEGFDAIVLATGYKSNVPFWLKDRELFSEKDGLPRKAFPNGWKGENGLYSVGFTRRGLMGTSLDARRIAHDIEQQWKAKGTRPDVFL*
>SiYUC7-Seita.7G015800.1.p（https://alphafold.ebi.ac.uk/entry/A0A4V6D3P4）
MVLLPTDRMDSLFSPRCVWVNGPIIIGAGPSGLAVAACLREQGVPYVILERADCIASLWQKRTYNRLKLHLPKQFCELPRMPFPDHYPKYPTRRQFIDYLEDYAAKFEIKPEFNSTVQSARYDETSGLWRVLTSAPATGDMEYIGSWIVVATGENAESVVPDIPGLEGFDGKVTHVSDYKSGEIYNGKSVLVVGCGNSGLEVSLDLSDHGAKPAMVVRDAVHVLPREVLGKSTFELAVLLMRWLPLWIVDKIMILLAWLVLGDLAKLGLRRPAAGPLELKETHGRTPVLDYGALARIRAGDIAVVPAVKRFAKGTQVELADGRVLNFDAVILATGYRSNVPQWLQGNDFFTKDGYPKIAFPHGWKGQSGLYAVGFTRRGLSGASADAVRIAADLGNVWREETKPSKRPGACHRRCISVVF*
>SiYUC11-Seita.7G279100.1.p（https://alphafold.ebi.ac.uk/entry/A0A4V6D4N2）
MEKVLVLIVGAGPSGLAVAACLSQLSIPYCIVEREDCSASLWRKRTYDRLKLHLAKEFCELPHMSYPSDTPTYINKEQFVRYVDAYVDHFNIFPKYSTSVESCKYDEVSNCWDVMAHDKVTGLVIEYTARFLVVATGENSEGIIPEIPGLHDFPGEVIHSSGYKSWNNYAGKEVLVIGCGNSGMEIAYDLASHGVETSVVIRSPVHVMTKGLINLGMKLVNWRLPVKFVDFIIVTLANIRYGDLSKYGIIRPNMGPFLLKAKTGRSAVIDVGTVDLIKKGVIKVLSSVSCIREDSIEFEDGKNCCFDSIVFATGYKSTANRWLKNGEGLLNESGMPKREFPNHWKGENGLYCVGLAMKGLSGISCDAKTVAADIKSIVDSMGSFY*
>SiYUC14-Seita.8G100900.1.p（https://alphafold.ebi.ac.uk/entry/K3ZMF7）
MEEVVVLIVGAGPAGLATAACLGRCSVPYLVVEREDCSASLWRHRTFDRVKLHLAKEFCALPYMPYPDGTPTYVPKQEFIKYLDSYAEHFCIKPRYCTSVESAAYDEGARRWVIAARDTVAGTEIQYVVRYLVVATGENAVGRIPEIPGIESFPGEATHSSTYKSGGRYAGQRVLVVGSGNSGMEIAYDLASHGADTSIVVRSPVHIMTKDLIRLGMTLVQHIPIKIVDLLLVTIANFTFGDLSKHGIVRPKTGPLLMKSKTGRSPVINVGTVGLIKKGIIKVFGEISNIIGNKVEFGCGKESYFDAIVFATGYKTTVNLWLKDDKCMLNSDGFPKKGYPNHWKGQNGLYCAGFARRGLAGISMDANNIANDIVSAVDFLPD*
>SiYUC4-Seita.8G204700.1.p（https://alphafold.ebi.ac.uk/entry/A0A368S9U8）
MVLIVGAGPAGLATAACLTQLSIPYVIVEREYCSASLWRNRAYDRLKLHLAKEFCELPHMSYPADAPTYIPKDQFVKYLDSYIECFNIRPKYHTAIESCTYDEARRCWLGVAHDMKTSVSVRYMARFLVVASGENSAENIPVIPGLHCFTGETIHSSRYKSGATYSGKNVLVVGCGNSGMEIAYDLASHGANTSIVIRSPVHVTTKEIIRLGMTLVQHTPVNVVDDLLVRLSNYVFGDLSRHGIVRPKMGPLLLKEKIGRSAVIDVGTVGLIKKGTIKVLGNISKIKGKIVEFEDRNEDTFDAIVFATGYKSTANTWLKNGESMLNNDGLPKKEFPNHWKGENGLYCAGLAKRGLAGIAMDAKNIANDILSCLASMHDI*
>SiYUC5-Seita.8G207600.1.p（https://alphafold.ebi.ac.uk/entry/A0A368SA46）
MGVTVVLIVGAGPAGLATAACLTQLSIPYVIVEREDCSASLWRNRAYDRLKLHLAKEFCELPHMSYPADAPTYIPKDQFVKYLDNYIERFDIRPKYHTAIESCSYDEVRKCWFSMARDVTTSVAVRYTSKFLVVASGENSAENIPMIPGLQSFAGEVIHSSRYKSGSSYSGKNVLVVGCGNSGMEIAYDLASHGANTSIVIRSPVHVVTKEIIRLGMTLVQHTPVNIVDDFLVRMSNFVFDDLSRHGIVRPKLGPLLLKAETGRSPVIDVGTVGLIKNGTIKVLGNISKIKGNIVEFEGRKESAFDAIVFATGYKSTANMWLKNGESMLNNDGLPMKEFPNHWKGANGLYCAGLAKRGLAGIAMDAKNIANDISSNYHA*
>SiYUC12-Seita.8G207800.1.p（https://alphafold.ebi.ac.uk/entry/K3ZMH0）
MEEQTVVLIVGAGPAGLATAACLTHLSIPYVIVEREDCSASLWRNRAYDRLKLHLAKEFCELPHMSYPADAPTYIPKDQFVKYLDNYIERFDIRPKYHTAIESCSYDEVRKCWFSMARDVTTSVAVRYIARFLVVASGENSVGNIPVIPGLQSFAGEAIHSSRYKSGSSYSGKNVLVVGCGNSGMEIAYDLASHGANTSIVVRSPLHVVTKEIMRLGMTLVQHTPVNIVDDLLVRMSDFVFGDLSRHGVVRPKLGPLLLKAKTGRSAVIDVGTVGLIKNGTIKVLGNISKIKGNIVEFEGRKESAFDAIVFATGYKSTANTWLKNGESMLNDDGLPKQEFPYHWKGANGLYCAGLAKRGLAGIAMDAKNIANDISSNYHA*
>SiYUC8-Seita.9G531500.1.p（https://alphafold.ebi.ac.uk/entry/K4AJC6）
MQEQAADAAGNSPSRRDQNSGAGCCLVRGPIIVGAGPSGLAVAAALSRHAVPFTVLERSDGIADLWTNRTYDRLRLHLPKVFCELPHVGFPADFPTYPTKHDFLRYLRSYAARFAVSPLFGRTVTRARFDAAASLWRVTAVSAEDGGRATEYVSPWLVVASGENAEVVVPKVKGRGRFAGEVLHSSAYRSGERFKGMRVLVVGCGNSGMEMCLDLCEHGAMPFMSVRSGVHVLPREMFGTSTFGIAMKLLKWLPIKLVDRFLLLVAKMVLGDTEKHGLRRPKLGPLEIKNITGKSPVLDVGAWSLIKSGNIKIVPEVESFTGGNGVRFVDGNEMDFDAVIFATGYRSNVPSWLKDSELFTEDGKAKAQQPASSWRGPNGLYCVGFSGRGLLGAGADALSAAADIAGRWQAVAAAAAAAGAKISSV*
>SiYUC13-Seita.J031600.1.p（https://alphafold.ebi.ac.uk/entry/K4APM4）
MAVAEEEEVIIVGAGQSGIAVAACLSLRGVRSLVLERDDCVGSLWRKRAYDRLHLHLAKQYSALPHAPHAEEAPTYLPRDEFARYLDGYAARFAVRTRLRREVRSAGFDAGKGRWEVEAVDLATGQRELYAARFLVVASGENDERFVPEVPGLEAFPGTVVHAAEYRSGEGLRGKAVLVVGCGNSGMEIAYDLAAAGAVTSISVRSELHLVTKEIWNVAMSLYGYHVPAWIIDKLVLLMCAVVFGGDTARHGLRRPAWGPSP*
